# Supplementary material
Source: publisher site journal article supplement (https://www.dovepress.com/article/252293)
Supplement: Supplementary file 1 [file get_supplementary_file.php]

**I. Supplementary Methods S1. [11C]Pittsburg compound B (PiB) – positron emission tomography (PET) preprocessing**

The image preprocessing steps were performed using Statistical Parametric Mapping 8 (SPM8; http://www.fil.ion.ucl.ac.uk/spm) implemented in MATLAB 2014a (Mathworks, Natick, MA, USA). Static PiB-PET images were coregistered to individual T1 structural images, and transformation parameters for the spatial normalization of individual T1 images to a standard Montreal Neurological Institute (MNI) template were calculated. The inverse transformation parameters to transform coordinates from the automatic anatomic labeling (AAL) 116 atlas1 into an individual space for each subject (a resampling voxel size = 1 x 0.98 x 0.98 mm) were performed using IBASPM software. To extract gray matter (GM) and exclude the non-GM portions of the atlas (i.e., white matter [WM] and cerebrospinal fluid space), a GM mask was applied for each individual.

The mean regional 11C-PiB uptake values from cerebral regions were extracted using the individual AAL116 atlas from T1-coregistered PiB-PET images. As the reference region for quantitative normalization of cerebral PiB uptake values, cerebellar GM was used due to its relatively low β–amyloid (Aβ) deposition,2 using a probabilistic cerebellar atlas (Institute of Cognitive Neuroscience, UCL; Cognitive Neuroscience Laboratory, Royal Holloway) that was transformed into individual space in the same manner as described above.

The automatic anatomic labeling algorithm and a region combining method3 were applied to determine regions of interest (ROIs) to characterize the 11C-PiB retention level in the frontal, lateral parietal, posterior cingulate-precuneus, and lateral temporal regions.

**References**

1. Tzourio-Mazoyer N, Landeau B, Papathanassiou D, et al. Automated anatomical labeling of activations in SPM using a macroscopic anatomical parcellation of the MNI MRI single-subject brain. Neuroimage. 2002;15(1):273-89.

2. Lopresti BJ, Klunk WE, Mathis CA, et al. Simplified quantification of Pittsburgh Compound B amyloid imaging PET studies: a comparative analysis. J Nucl Med. 2005;46(12):1959-72.

3. Reiman EM, Chen K, Liu X, et al. Fibrillar amyloid-beta burden in cognitively normal people at 3 levels of genetic risk for Alzheimer's disease. Proc Natl Acad Sci U S A. 2009;106(16):6820-5.

**Supplementary Table 1. Absolute brain volume measures**

|  | **NeuroQuant** | (cm3) | **Freesurfer** | (cm3) |
| --- | --- | --- | --- | --- |
|  | Mean ± SD | Range | Mean ± SD | Range |
| Total intracranial volume | 1449.92 ± 125.04 | 1250.12 - 1859.81 | 1419.93 ± 137.53 | 1170.58 - 1837.20 |
| Whole-brain parenchyma | 1077.60 ± 90.87 | 893.28 - 1382.63 | 1026.64 ± 89.25 | 869.33 - 1316.52 |
| Forebrain parenchyma | 933.86 ± 81.66 | 769.48 - 1208.72 | 900.53 ± 80.69 | 755.35 - 1165.41 |
| Cortical GM | 416.11 ± 44.64 | 308.05 - 526.48 | 389.64 ± 35.78 | 293.03 - 498.27 |
| Cerebral WM | 416.11 ± 44.64 | 308.05 - 526.48 | 421.47 ± 54.83 | 318.90 - 735.38 |
| Lateral ventricle | 41.20 ± 16.04 | 14.72 - 91.92 | 33.84 ± 14.26 | 10.22 - 78.47 |
| Inferior lateral ventricle | 3.10 ± 1.34 | 0.79 - 7.02 | 1.76 ± 1.17 | 0.13 - 5.21 |
| 3rd ventricle | 2.31 ± 0.70 | 0.93 - 4.31 | 1.99 ± 0.65 | 0.88 - 4.08 |
| Caudate | 5.83 ± 1.54 | 2.56 - 15.49 | 6.48 ± 0.94 | 4.43 - 9.38 |
| Putamen | 10.83 ± 1.26 | 8.01 - 15.06 | 8.53 ± 1.20 | 5.84 - 13.17 |
| Pallidum | 0.83 ± 0.22 | 0.19 - 1.53 | 2.76 ± 0.39 | 1.82 - 4.15 |
| Thalamus | 14.90 ± 1.46 | 11.91 - 19.70 | 12.70 ± 1.12 | 10.03 - 16.19 |
| Amygdala | 2.74 ± 0.50 | 1.42 - 3.89 | 2.46 ± 0.42 | 1.24 - 3.46 |
| Hippocampus | 6.04 ± 1.10 | 3.06 - 8.84 | 6.67 ± 1.12 | 3.48 - 8.84 |
| WM hypointensities | 2.05 ± 3.93 | 0.00 - 28.11 | 4.92 ± 6.15 | 0.42 - 37.17 |

Note. GM, gray matter; WM, white matter

**Supplementary Table 2. Variance inflation factor**

|  | **Variance inflation factor** | |
| --- | --- | --- |
|  | **Percentage (%) of ICV** | **Normative percentile** |
| Whole-brain parenchyma | 3.615 | 2.635 |
| Cortical GM | 3.650 | 2.397 |
| Cerebral WM | 2.047 | 1.630 |
| Lateral ventricle | 3.476 | 1.969 |
| Inferior lateral ventricle | 3.839 | 2.616 |
| Third ventricle | 2.495 | 1.748 |
| Thalamus | 1.254 | 1.316 |
| Hippocampus | 2.233 | 1.588 |
| WM hypointensities | 1.039 | 1.037 |

Note. GM, gray matter; WM, white matter
